# Supplementary material for: THz and mid-IR spectroscopy of interstellar ice analogs: methyl and carboxylic acid groups
Source: Royal Society of Chemistry journal article supplement (doi:10.1039/c3fd00154g), 2014-01-01
Supplement: c3fd00154g3.pdf [file c3fd00154g3.pdf]

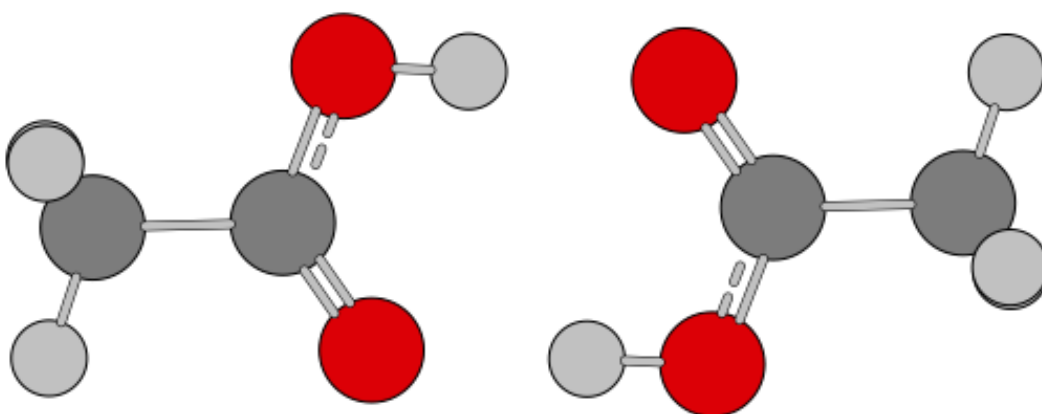

Figure S1. The optimized MP2/6-311+G\*\* geometry of the acetic acid dimer used in the study.

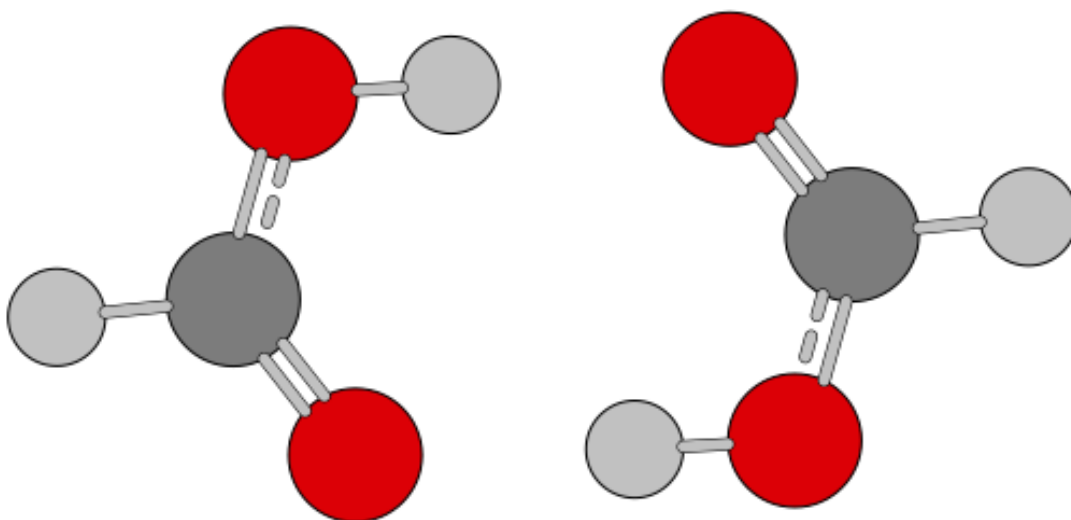

Figure S2. The optimized MP2/6-311+G\*\* geometry of the formic acid dimer used in the study.
