# Supplementary figures and images for: THz and mid-IR spectroscopy of interstellar ice analogs: methyl and carboxylic acid groups
Source: Royal Society of Chemistry journal article supplement (doi:10.1039/c3fd00154g), 2014-01-01

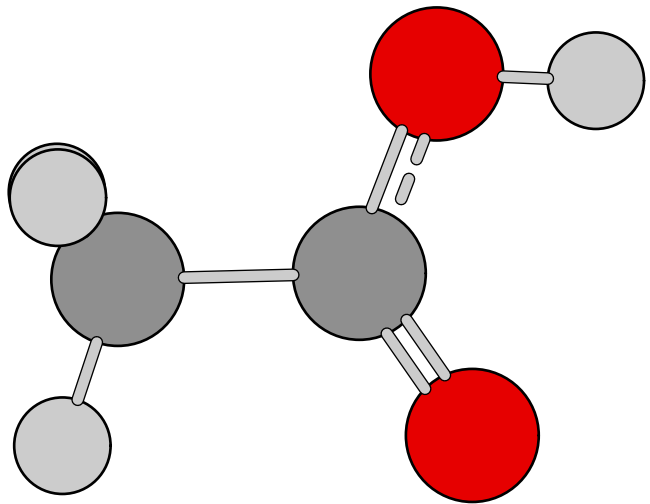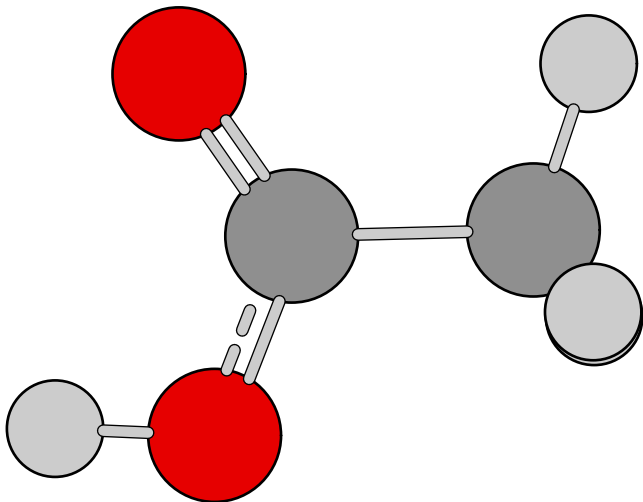

Supplement: c3fd00154g1.pdf [file c3fd00154g1.pdf]

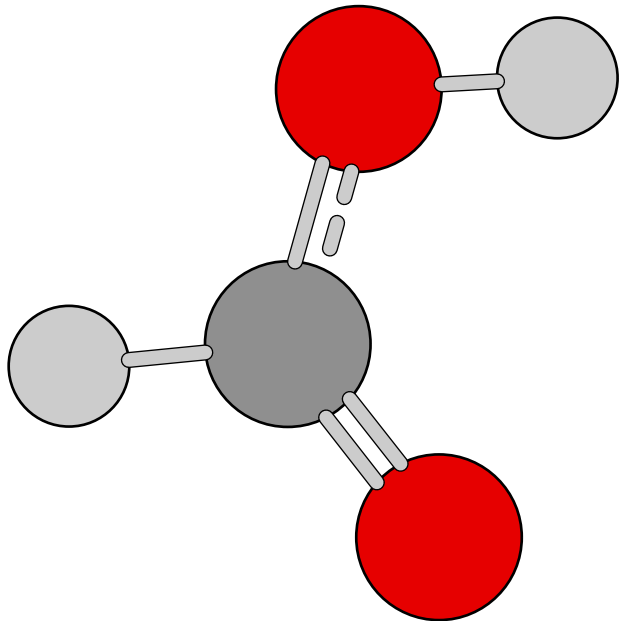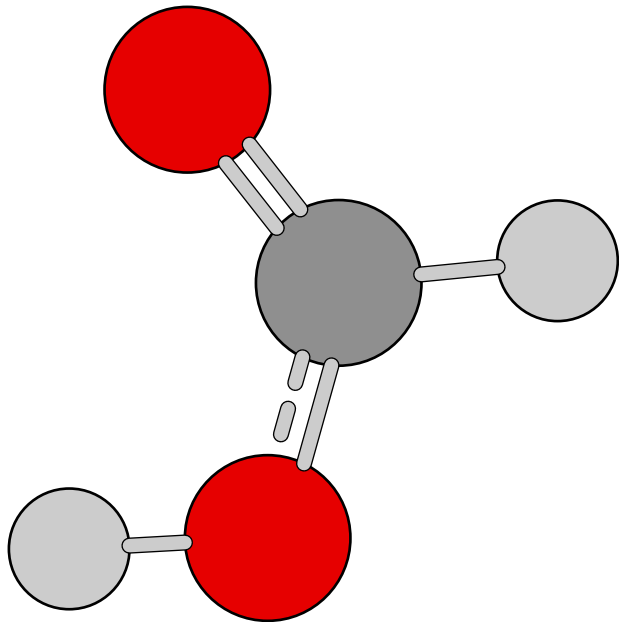

Supplement: c3fd00154g2.pdf [file c3fd00154g2.pdf]
